# Supplementary material for: Non-invasive Assessment of Systolic and Diastolic Cardiac Function During Rest and Stress Conditions Using an Integrated Image-Modeling Approach
Source: PubMed Central journal article supplement (PMC6218619; doi:10.3389/fphys.2018.01515), 2018-10-30
Supplement: Table_1.pdf [file Table_1.pdf]

## *Supplementary Material*

# Non-invasive assessment of systolic and diastolic left ventricular function during rest and stress conditions using an integrated image-modelling approach

Belén Casas<sup>1,2</sup>, Federica Viola<sup>1</sup>, Gunnar Cedersund<sup>4</sup>, Ann F. Bolger<sup>1,5</sup>, Matts Karlsson<sup>2,6</sup>, Carl-Johan Carlhäll<sup>1,2,3</sup>, Tino Ebbers<sup>1,2\*</sup>

1 - Division of Cardiovascular Medicine, Department of Medical and Health Sciences, Linköping University, Linköping, Sweden.

2 - Center for Medical Image Science and Visualization (CMIV), Linköping University, Linköping, Sweden.

3 - Department of Clinical Physiology, Department of Medical and Health Sciences, Linköping University, Linköping, Sweden.

4 - Department of Biomedical Engineering, Linköping University, Linköping, Sweden.

5 - Department of Medicine, University of California San Francisco, San Francisco, California, USA.

6 - Division of Applied Thermodynamics and Fluid Mechanics, Department of Management and Engineering, Linköping University, Linköping, Sweden

\* **Correspondence:** Tino Ebbers: [tino.ebbers@liu.se](mailto:tino.ebbers@liu.se)

## 1 Methods

### 1.1 Model parameters

**Table S1:** Parameters in the lumped-parameter model, including parameter values defined in literature.

| Parameter                      | Description (units)                                                    | Literature values                             |
|--------------------------------|------------------------------------------------------------------------|-----------------------------------------------|
| <b>Pulmonary venous system</b> |                                                                        |                                               |
| $P_{pu}$                       | Pulmonary capillary pressure (mmHg)                                    | 7.4 (Sun et al.)                              |
| $R_{pv}^a$                     | Resistance of pulmonary veins (mmHg·s/mL)                              | $2 \cdot 10^{-3}$ (Sun et al.)                |
| $L_{pv}^a$                     | Inertance of pulmonary veins (mmHg·s <sup>2</sup> /mL)                 | $5 \cdot 10^{-4}$ (Sun et al. <sup>14</sup> ) |
| $R_{pvc}^a$                    | Viscoelastic resistance of pulmonary capillaries and veins (mmHg·s/mL) | 0.01 (Sun et al. <sup>14</sup> )              |
| $C_{pvc}^a$                    | Capacitance of pulmonary capillaries and veins (mL/mmHg)               | 4 (Sun et al. <sup>14</sup> )                 |

|            |                                                    |                                  |
|------------|----------------------------------------------------|----------------------------------|
| $R_{pu}^a$ | Resistance of pulmonary capillaries<br>(mmHg·s/mL) | 0.01 (Sun et al. <sup>14</sup> ) |
|------------|----------------------------------------------------|----------------------------------|

---

**Heart parameters**


---

**Left atrium (LA)**


---

|                 |                                                    |                                                   |
|-----------------|----------------------------------------------------|---------------------------------------------------|
| $K_{S,LA}$      | Source resistance coefficient of the LA (s/mL)     | $10 \cdot 10^{-9}$ (Mynard et al. <sup>15</sup> ) |
| $E_{min,LA}$    | Minimal elastance of the LA (mmHg/mL)              | 0.08 (Mynard et al. <sup>15</sup> )               |
| $E_{max,LA}$    | Maximal elastance of the LA (mmHg/mL)              | 0.17 (Mynard et al. <sup>15</sup> )               |
| $V_{0,LA}^a$    | Unstressed volume of the LA (mL)                   | 3 (Mynard et al. <sup>15</sup> )                  |
| $R_{C,LA}$      | Contraction rate constant of the LA (-)            | 1.32 (Mynard et al. <sup>15</sup> )               |
| $R_{R,LA}$      | Relaxation rate constant of the LA (-)             | 13.1 (Mynard et al. <sup>15</sup> )               |
| $\alpha_{1,LA}$ | Systolic time constant shape factor of the LA (-)  | 0.11 (Mynard et al. <sup>15</sup> )               |
| $\alpha_{2,LA}$ | Diastolic time constant shape factor of the LA (-) | 0.18 (Mynard et al. <sup>15</sup> )               |
| $R_{visc,LA}^a$ | Viscous loss resistance for the LA (mmHg·s/mL)     | $1 \cdot 10^{-4}$ (Mynard et al. <sup>15</sup> )  |
| $Onset_{LA}$    | Onset of contraction of the LA (s)                 | 0.85 (Mynard et al. <sup>15</sup> )               |

---

**Left ventricle (LV)**


---

|                 |                                                   |                                                  |
|-----------------|---------------------------------------------------|--------------------------------------------------|
| $K_{S,LV}^a$    | Source resistance coefficient of the LV (s/mL)    | $4 \cdot 10^{-9}$ (Mynard et al. <sup>15</sup> ) |
| $E_{min,LV}$    | Minimal elastance of the LV (mmHg/mL)             | 0.08 (Mynard et al. <sup>15</sup> )              |
| $E_{max,LV}$    | Maximal elastance of the LV (mmHg/mL)             | 3 (Mynard et al. <sup>15</sup> )                 |
| $V_{0,LV}^a$    | Unstressed volume of the LV (mL)                  | 10 (Mynard et al. <sup>15</sup> )                |
| $R_{C,LV}$      | Contraction rate constant of the LV (-)           | 1.32 (Mynard et al. <sup>15</sup> )              |
| $R_{R,LV}$      | Relaxation rate constant of the LV (-)            | 27.4 (Mynard et al. <sup>15</sup> )              |
| $\alpha_{1,LV}$ | Systolic time constant shape factor of the LV (-) | 0.269 (Mynard et al. <sup>15</sup> )             |

|                                 |                                                               |                                                  |
|---------------------------------|---------------------------------------------------------------|--------------------------------------------------|
| $\alpha_{2,LV}$                 | Diastolic time constant shape factor of the LV (-)            | 0.452 (Mynard et al. <sup>15</sup> )             |
| $R_{visc,LV}^b$                 | Viscous loss resistance for the LV (mmHg·s/mL)                | $1 \cdot 10^{-4}$ (Mynard et al. <sup>15</sup> ) |
| $Onset_{LV}$                    | Onset of contraction of the LV (s)                            | 0 (Mynard et al. <sup>15</sup> )                 |
| <b>Mitral valve</b>             |                                                               |                                                  |
| $R_{mv}$                        | Resistance of the mitral valve (mmHg·s/mL)                    | $3.75 \cdot 10^{-3}$ (Sun et al. <sup>14</sup> ) |
| $L_{mv}$                        | Inertance of the mitral valve (mmHg·s <sup>2</sup> /mL)       | $2 \cdot 10^{-4}$ (Sun et al. <sup>14</sup> )    |
| <b>Aortic valve</b>             |                                                               |                                                  |
| $EOA_{av}$                      | Effective orifice area of the aortic valve (cm <sup>2</sup> ) | 1.69 (Garcia et al. <sup>16</sup> )              |
| $A_{ao}$                        | Cross sectional area of the aorta (cm <sup>2</sup> )          | 5 (Olufsen et al. <sup>64</sup> )                |
| $L_{av}$                        | Inertance of the aortic valve (mmHg·s <sup>2</sup> /mL)       | $4 \cdot 10^{-4}$ (Sun et al. <sup>14</sup> )    |
| <b>Systemic arterial system</b> |                                                               |                                                  |
| $R_{aa}$                        | Resistance of the ascending aorta (mmHg·s/mL)                 | 0.04 (Sun et al. <sup>14</sup> ),                |
| $L_{aa}$                        | Inertance of the ascending aorta (mmHg·s <sup>2</sup> /mL)    | $5 \cdot 10^{-4}$ (Sun et al. <sup>14</sup> ),   |
| $R_{aav}$                       | Viscoelastic resistance for $C_{aa}$ (mmHg·s/mL)              | 0.01 (Sun et al. <sup>14</sup> )                 |
| $C_{aa}$                        | Capacitance of the ascending aorta (mL/mmHg)                  | 0.1 (Sun et al. <sup>14</sup> )                  |
| $R_{pc}$                        | Viscoelastic resistance for $C_{pc}$ (mmHg·s/mL)              | -                                                |
| $R_{pr}$                        | Peripheral resistance (mmHg·s/mL)                             | 1.2 (Sun et al. <sup>14</sup> ),                 |
| $C_{pc}$                        | Peripheral compliance (mL/mmHg)                               | 2 (Sun et al. <sup>14</sup> )                    |
| <b>Other parameters</b>         |                                                               |                                                  |
| $T^b$                           | Duration of the cardiac cycle (s)                             | -                                                |
| $\rho$                          | Density of blood (g/mL)                                       | 1.06                                             |

## 2 Results

**Table S2:** Subject-specific fitting results for the nine subjects included in the study. The agreement between the measured and the model-generated waveforms is assessed using the root mean square error (RMSE). MV: mitral valve; AV: aortic valve; AA: ascending aorta.

| Subject | RMSE (ml/s) |      |      |      |            |      |
|---------|-------------|------|------|------|------------|------|
|         | MV          | Rest |      |      | Dobutamine |      |
|         |             | AV   | AA   | MV   | AV         | AA   |
| 1       | 29.7        | 25.8 | 21.5 | 58.3 | 66.8       | 31.1 |
| 2       | 32.4        | 26.1 | 23.0 | 58.0 | 29.5       | 36.2 |
| 3       | 22.7        | 16.1 | 23.3 | 49.4 | 51.9       | 35.6 |
| 4       | 27.7        | 17.2 | 20.6 | 77.6 | 29.0       | 21.5 |
| 5       | 15.4        | 19.6 | 18.7 | 32.3 | 35.6       | 25.1 |
| 6       | 34.8        | 30.4 | 33.1 | 76.6 | 82.4       | 47.9 |
| 7       | 24.3        | 19.7 | 24.9 | 44.1 | 82.7       | 46.1 |
| 8       | 18.4        | 16.0 | 16.0 | 60.5 | 46.1       | 62.2 |
| 9       | 20.0        | 18.6 | 19.0 | 22.1 | 24.8       | 27.5 |

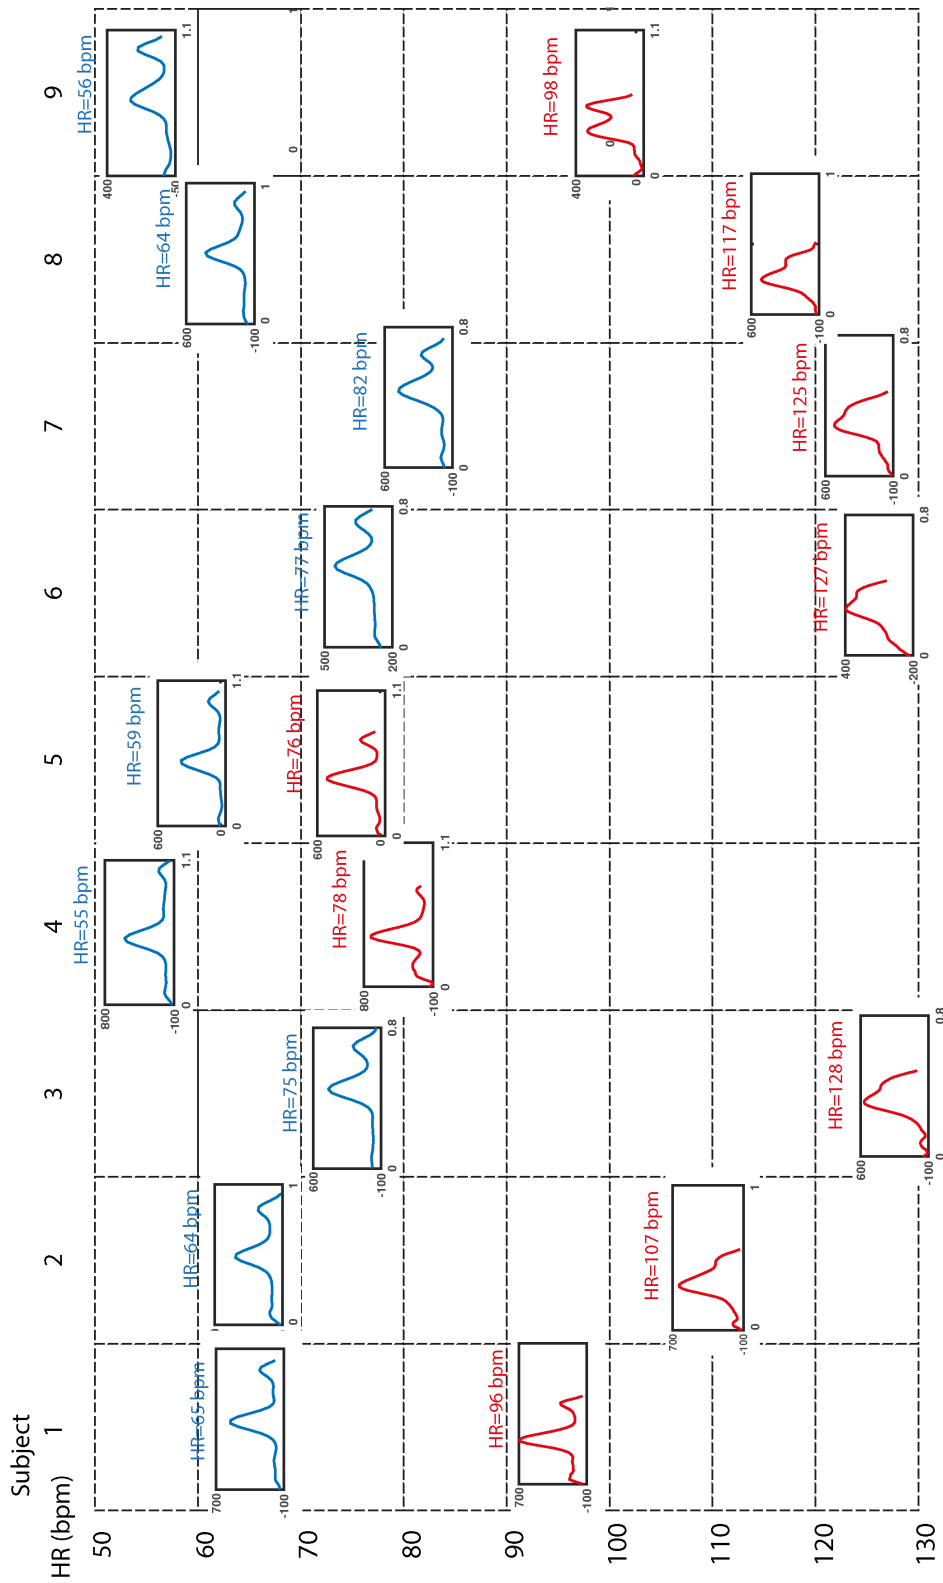

**Figure S1:** Changes in 4D Flow MRI-derived mitral flow waveforms with increasing heart rates for all study subjects. For each subject, the mitral flow patterns at rest (blue) and after dobutamine infusion (red) are included. The x and y-axis of the volumetric flow waveforms indicate time (s) and flow (ml/s), respectively.
